# Supplementary material
Source: MDPI journal article supplement (https://www.mdpi.com/2073-4433/14/3/577)
Supplement: s1 [file s1]

AIR QUALITY IMPACT ESTIMATION DUE TO UNCONTROLLED EMISSIONS FROM  
CAPUAVA PETROCHEMICAL COMPLEX IN THE METROPOLITAN AREA OF SÃO PAULO  
(MASP), BRAZIL

Monique Silva Coelho\*, Daniel Constantino Zacharias, Tayná Silva de Paulo, Rita Yuri Ynoue, Adalgiza Fornaro

Departamento de Ciências Atmosféricas (DCA), Instituto de Astronomia, Geofísica e Ciências Atmosféricas, Universidade de São Paulo (USP), São Paulo, São Paulo, Brasil.

\*Corresponding author: [monique.coelho@iag.usp.br](mailto:monique.coelho@iag.usp.br)

**Table S1.** Summary of statistical analysis for hourly concentrations ( $\mu\text{g m}^{-3}$ ) in the Capuava AQS, during 2017-2022 and modeled data provided by AERMOD.

| <b>BENZENE</b>                            |       |      |       |      |        |                          |                          |      |
|-------------------------------------------|-------|------|-------|------|--------|--------------------------|--------------------------|------|
| Year                                      | Mean  | S.D. | Max.  | Min. | Median | 1 <sup>st</sup> quartile | 3 <sup>th</sup> quartile | N    |
| 2017                                      | 2.70  | 3.98 | 52.6  | 0.1  | 1.2    | 0.54                     | 2.92                     | 8277 |
| 2018                                      | 1.55  | 2.6  | 46.2  | 0.1  | 0.62   | 0.32                     | 1.63                     | 6561 |
| 2019                                      | 2.70  | 4.25 | 74.5  | 0.1  | 1.3    | 0.58                     | 2.95                     | 7567 |
| 2020                                      | 2.48  | 4.19 | 52.2  | 0.1  | 0.91   | 0.48                     | 2.42                     | 1630 |
| Episode                                   | 4.60  | 8.73 | 79.1  | 0.02 | 1.45   | 0.64                     | 4.26                     | 1141 |
| 2021                                      | 4.19  | 7.1  | 77.7  | 0.1  | 1.6    | 0.75                     | 4.38                     | 4878 |
| 2022                                      | 3.06  | 4.93 | 49.4  | 0.1  | 1.3    | 0.6                      | 3.3                      | 3154 |
| <b>TOLUENE</b>                            |       |      |       |      |        |                          |                          |      |
| 2017                                      | 5.37  | 4.89 | 44.7  | 0.14 | 4.1    | 1.94                     | 7.16                     | 8291 |
| 2018                                      | 4.74  | 4.8  | 55.3  | 0.15 | 3.34   | 1.63                     | 6.17                     | 6562 |
| 2019                                      | 4.71  | 5.29 | 64.6  | 0.1  | 3.26   | 1.45                     | 6.18                     | 7564 |
| 2020                                      | 3.74  | 3.96 | 48.2  | 0.14 | 2.7    | 1.21                     | 5.1                      | 1628 |
| Episode                                   | 7.10  | 7.34 | 58.7  | 0.3  | 5.07   | 2.04                     | 9.4                      | 1154 |
| 2021                                      | 5.97  | 6.4  | 69.4  | 0.1  | 4.1    | 1.64                     | 7.83                     | 4867 |
| 2022                                      | 5.55  | 6.25 | 72.8  | 0.1  | 3.7    | 1.30                     | 7.5                      | 3153 |
| <b>PM<sub>10</sub></b>                    |       |      |       |      |        |                          |                          |      |
| 2017                                      | 26.0  | 21.5 | 184   | 1.0  | 21.0   | 12.0                     | 35.0                     | 8585 |
| 2018                                      | 24.6  | 20.7 | 192   | 1.0  | 19.0   | 11.0                     | 33.0                     | 8305 |
| 2019                                      | 21.6  | 17.3 | 222   | 1.0  | 18.0   | 9.0                      | 29.0                     | 7951 |
| 2020                                      | 21.7  | 19.8 | 171   | 1.0  | 16.0   | 8.0                      | 28.0                     | 7221 |
| Episode                                   | 29.3  | 25.5 | 174   | 1.0  | 21.0   | 11.0                     | 39.0                     | 1450 |
| 2021                                      | 28.1  | 22.8 | 201   | 1.0  | 22.0   | 13.0                     | 36.0                     | 7021 |
| 2022                                      | 29.4  | 21.4 | 185   | 1.0  | 25.0   | 15.0                     | 38.0                     | 4321 |
| <b>Modeled data - April and May, 2021</b> |       |      |       |      |        |                          |                          |      |
| PM                                        | 5.8   | 13.9 | 119.1 | 0.03 | 0.81   | 0.24                     | 3.81                     | 1464 |
| VOC                                       | 27.84 | 61.0 | 433.8 | 0.3  | 4.2    | 2.1                      | 9.94                     | 1464 |

**Table S2.** Summary of AERMOD input data extracted from Environmental Licenses of Braskem and RECAP.

| <b>BRASKEM</b> | <b>COORDINATES (m)</b> |              | <b>FLOW RATE</b>          | <b>POLLUTANTS (mg/Nm<sup>3</sup>)</b> |           |
|----------------|------------------------|--------------|---------------------------|---------------------------------------|-----------|
| <b>STACK</b>   | <b>UTM X</b>           | <b>UTM Y</b> | <b>(Nm<sup>3</sup>/s)</b> | <b>PM</b>                             |           |
| 1              | 348568                 | 7384835      | 17.372                    | 91.820                                |           |
| 2              | 348568                 | 7384835      | 17.927                    | 24.780                                |           |
| 3              | 348588                 | 7384829      | 19.936                    | 31.410                                |           |
| 4              | 348611                 | 7384825      | 14.572                    | 11.030                                |           |
| 5              | 348580                 | 7384809      | 16.846                    | 30.670                                |           |
| 6              | 348562                 | 7384812      | 18.149                    | 12.410                                |           |
| 7              | 348604                 | 7384802      | 18.740                    | 13.860                                |           |
| 8              | 348595                 | 7384773      | 18.140                    | 80.240                                |           |
| 9              | 348572                 | 7384778      | 6.923                     | 99.560                                |           |
| 10             | 348623                 | 7384797      | 8.607                     | 44.380                                |           |
| 11             | 348642                 | 7384784      | 2.195                     | 23.240                                |           |
| 12             | 348532                 | 7384771      | 18.033                    | 11.450                                |           |
| 13             | 348527                 | 7384775      | 16.853                    | 0.000                                 |           |
| 14             | 348443                 | 7384959      | 2.534                     | 0.000                                 |           |
| 15             | 348443                 | 7384949      | 0.975                     | 0.000                                 |           |
| 16             | 348446                 | 7384972      | 5.194                     | 0.000                                 |           |
| 17             | 348487                 | 7385054      | 3.497                     | 0.000                                 |           |
| 18             | 348478                 | 7385023      | 1.003                     | 0.000                                 |           |
| 19             | 348490                 | 7385064      | 11.804                    | 0.000                                 |           |
| 20             | 348552                 | 7384838      | 12.148                    | 0.000                                 |           |
| 21             | 348546                 | 7384818      | 12.148                    | 0.000                                 |           |
| 22             | 348475                 | 7384810      | 86.027                    | 17.800                                |           |
| 23             | 348759                 | 7385190      | 30.920                    | 8.820                                 |           |
| 24             | 348756                 | 7385208      | 20.900                    | 5.360                                 |           |
| 25             | 348581                 | 7384731      | 56.192                    | 0.000                                 |           |
| 26             | 348557                 | 7384736      | 56.192                    | 0.000                                 |           |
| 27             | 348595                 | 7384740      | 54.290                    | 0.000                                 |           |
| 28             | 348570                 | 7384746      | 54.290                    | 0.000                                 |           |
| <b>RECAP</b>   | <b>COORDINATES (m)</b> |              | <b>FLOW RATE</b>          | <b>POLLUTANTS (mg/Nm<sup>3</sup>)</b> |           |
| <b>STACK</b>   | <b>UTM X</b>           | <b>UTM Y</b> | <b>(Nm<sup>3</sup>/s)</b> | <b>VOC</b>                            | <b>PM</b> |
| <b>1</b>       | 7384480                | 349130       | 12.500                    |                                       | 31.340    |
| <b>2</b>       | 7384470                | 349140       | 12.500                    |                                       | 42.650    |
| <b>3</b>       | 7384450                | 349150       | 12.500                    |                                       | 33.620    |
| <b>4</b>       | 7384400                | 349290       | 61.111                    |                                       | 45.690    |
| <b>5</b>       | 7384390                | 349270       | 12.500                    |                                       | 94.580    |
| <b>6</b>       | 7384330                | 349340       | 13.889                    |                                       | 37.710    |
| <b>7</b>       | 7384500                | 349180       | 1.111                     |                                       | 211.480   |
| <b>8</b>       | 7384510                | 349230       | 1.667                     | 0.01                                  | 0.010     |
| <b>9</b>       | 7384150                | 349840       | 1.667                     | 0.01                                  | 0.010     |
| <b>10</b>      | 7384447                | 349377       | 1.667                     | 0.001                                 | 36.660    |

|           |         |        |        |       |         |
|-----------|---------|--------|--------|-------|---------|
| <b>11</b> | 7384319 | 349508 | 1.667  | 0.001 | 39.07   |
| <b>12</b> | 7384331 | 349517 | 1.667  | 0.001 | 39.07   |
| <b>13</b> | 7384283 | 349456 | 8.333  | 0.04  | 0.320   |
| <b>14</b> | 7384414 | 349580 | 25.000 |       | 38.300  |
| <b>15</b> | 7384362 | 349371 | 1.389  |       | 188.900 |

Table S3. Summary of statistical analysis of AERMET input data.

|                         | Temperature<br>(° C) | Relative<br>humidity<br>(%) | Atmospheric<br>pressure<br>(hPa) | Wind<br>direction<br>(°) | Wind<br>speed<br>(m.s <sup>-1</sup> ) | Cloud<br>coverage level | Cloud height<br>level |
|-------------------------|----------------------|-----------------------------|----------------------------------|--------------------------|---------------------------------------|-------------------------|-----------------------|
| <b>Availability (%)</b> | 99.9                 | 99.9                        | 100.0                            | 99.8                     | 100.0                                 | 100.0                   | 100.0                 |
| <b>Mín.</b>             | 11.6                 | 18.0                        | 919.4                            | 0.0                      | 0.0                                   | 0.0                     | 0.0                   |
| <b>Mean</b>             | 19.4                 | 71.4                        | 927.0                            | 134.8                    | 1.3                                   | 4.5                     | 4882.9                |
| <b>Máx.</b>             | 30.2                 | 93.0                        | 934.8                            | 360.0                    | 3.2                                   | 10.0                    | 9999.0                |
| <b>S.D.</b>             | 3.6                  | 16.1                        | 2.6                              | 93.6                     | 0.6                                   | 3.9                     | 4011.3                |

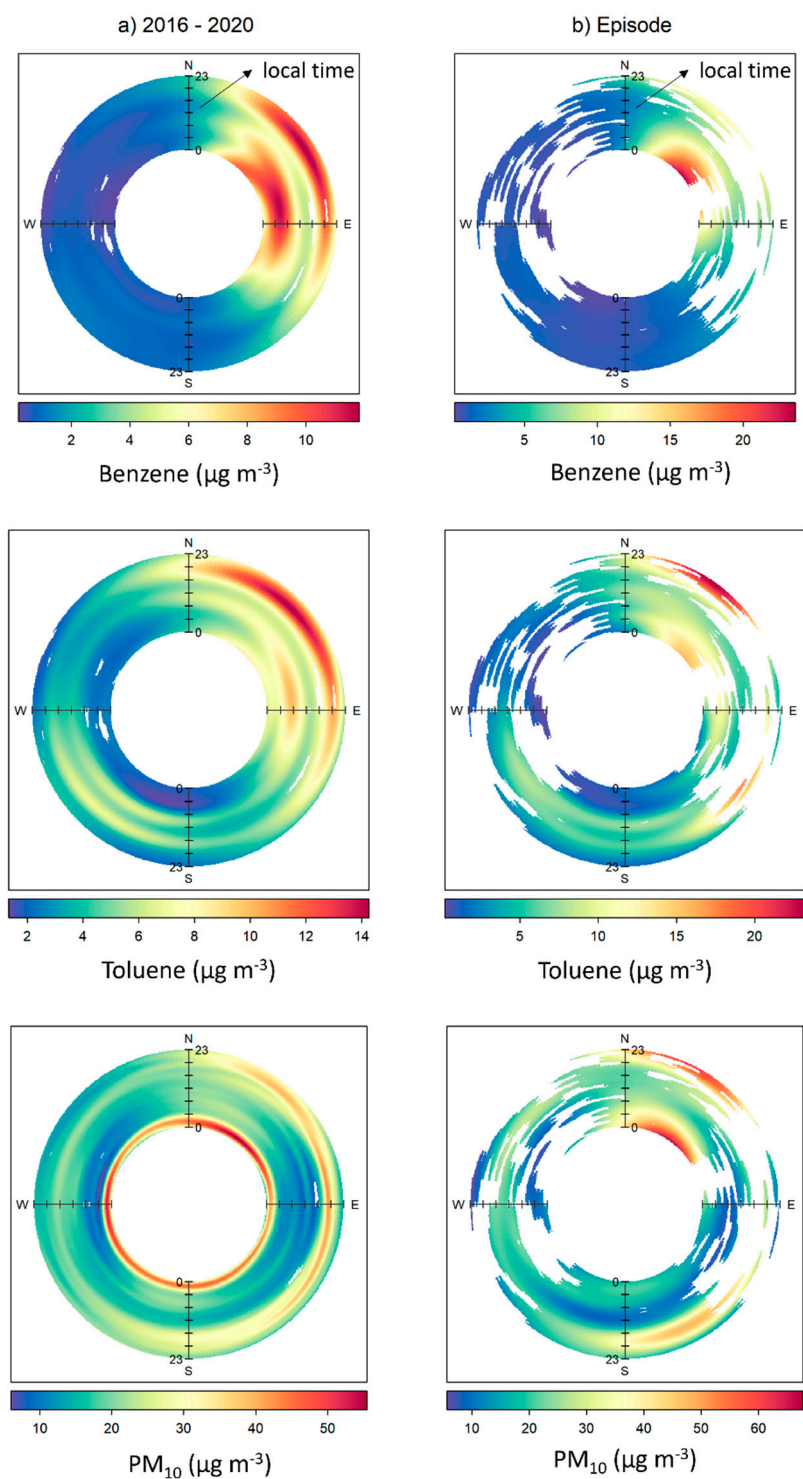

Figure S1. Changes in benzene, toluene and  $\text{PM}_{10}$  mean hourly concentrations at Capuava station, depending on wind directions. a) Polar annulus plots from 2017 – 2020 and b) Polar annulus plots for episode from April to May 2021. Color scale represents concentrations ( $\mu\text{g m}^{-3}$ ), the thickness in the circle represents the hour of the day: 00:00 inside to 11:00 p.m. outside. Blank spaces are missing values.
